# Supplementary material
Source: HighWire-hosted journal article supplement (https://jnm.snmjournals.org/highwire/filestream/94499/field_highwire_adjunct_files/0/117515_Supplemental_Data.pdf)
Supplement: 117515_Supplemental_Data.pdf [file 117515_Supplemental_Data.pdf]

A

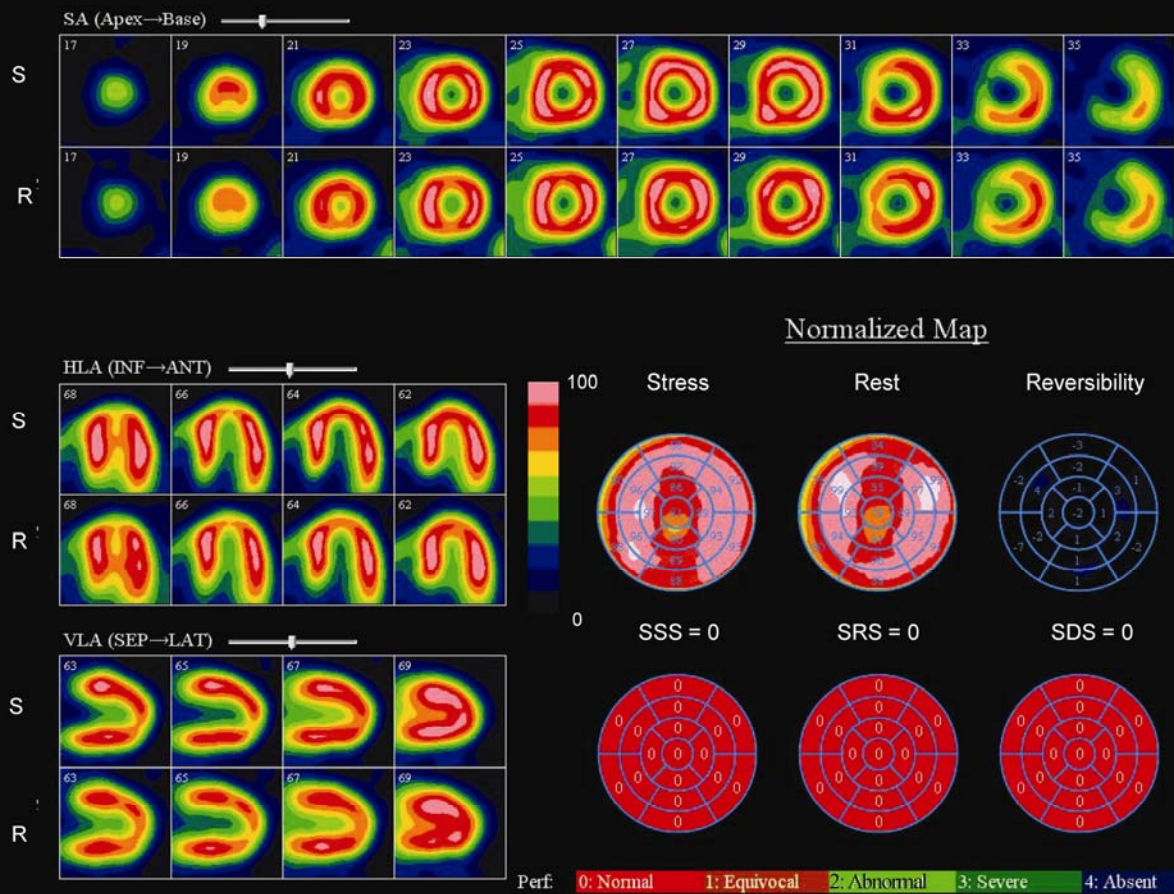

**B**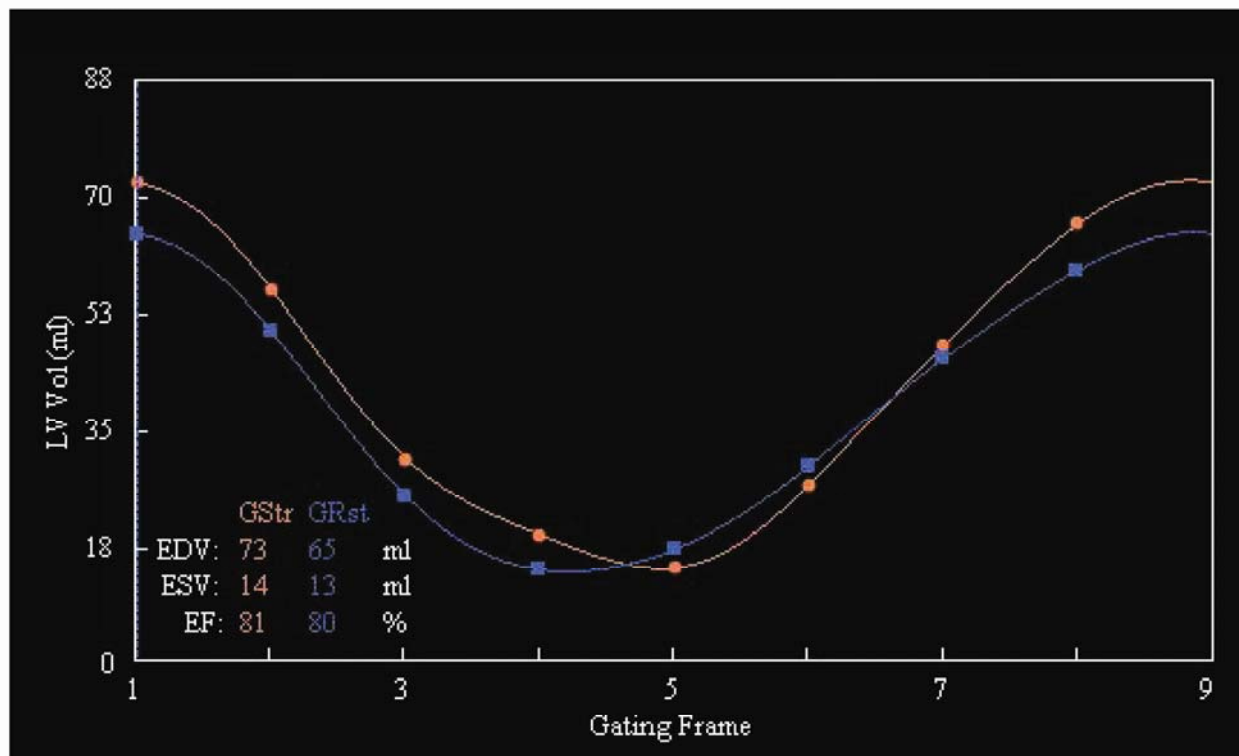

**Supplemental FIGURE 1:** Very good quality  $^{82}\text{Rb}$  PET images obtained in an obese 50-year-old female patient with BMI = 60 (height: 153cm, weight: 140kg) on the D690 PET-CT system using injected dose of 1410 MBq at rest and stress. Patient had a history of hypertension, diabetes and obesity, and underwent MPI for preoperative evaluation for a duodenal switch. (A) Perfusion images scored clinically as: SSS = SRS = SDS = 0, indicating normal perfusion; consistent with other reported findings of normal LV size, (B) normal ejection fraction and wall motion on ECG-gated images, no chest pain and no ischemic ST segment changes on ECG. S = stress, R = rest.

**Supplemental Table 1.** Patient Demographics by Site

| Description    | Site 1  | Site 2  | Site 3  | Site 4  | Site 5  | Site 6 | Site 7  | Site 1-TI | Site 2-Tc |
|----------------|---------|---------|---------|---------|---------|--------|---------|-----------|-----------|
| Male Gender    | 72%     | 68%     | 40%     | 64%     | 24%     | 76%    | 50%     | 60%       | 56%       |
| Age            | 60 ± 12 | 67 ± 12 | 63 ± 12 | 66 ± 11 | 65 ± 11 | 66 ± 9 | 67 ± 12 | 64 ± 12   | 66 ± 9    |
| BMI            | 32 ± 8  | 31 ± 8  | 29 ± 5  | 31 ± 6  | 31 ± 8  | 29 ± 5 | 29 ± 5  | 27 ± 4    | 31 ± 6    |
| Diabetes       | 24%     | 36%     | 48%     | 36%     | 24%     | 48%    | 33%     | 20%       | 40%       |
| Smoker*        | 84%     | 76%     | 48%     | 72%     | 56%     | 48%    | 54%     | 52%       | 80%       |
| Hypertension   | 80%     | 68%     | 76%     | 68%     | 64%     | 64%    | 58%     | 60%       | 76%       |
| Dyslipidemia   | 84%     | 92%     | 88%     | 80%     | 60%     | 72%    | 79%     | 72%       | 80%       |
| Family history | 56%     | 96%     | 20%     | 28%     | 52%     | 28%    | 42%     | 28%       | 72%       |
| Typical angina | 36%     | 28%     | 8%      | 28%     | 20%     | 8%     | 17%     | 4%        | 20%       |
| Previous MI    | 44%     | 44%     | 8%      | 20%     | 16%     | 28%    | 33%     | 24%       | 28%       |
| Previous PCI   | 48%     | 36%     | 8%      | 32%     | 4%      | 24%    | 29%     | 24%       | 32%       |

BMI = body mass index; \*Past or current
